# Supplementary material for: Association Between High‐Sensitivity C‐Reactive Protein and Prognosis in Different Periods After Ischemic Stroke or Transient Ischemic Attack
Source: PubMed Central journal article supplement — J Am Heart Assoc. 2022 Jun 29;11(13):e025464. doi: 10.1161/JAHA.122.025464 (PMC9333386; doi:10.1161/jaha.122.025464), 2022-06-29
Supplement: JAH3-11-e025464-s001.pdf [file JAH3-11-e025464-s001.pdf]

## **SUPPLEMENTAL MATERIAL**

**Table S1. Baseline Characteristics of Included and Excluded Patients**

|                                              | Excluded patients<br>n=5728 | Included patients<br>n=9438 | P      |
|----------------------------------------------|-----------------------------|-----------------------------|--------|
| Age, year                                    | 62(54-70)                   | 63(54-70)                   | 0.26   |
| Male                                         | 3913(68.31)                 | 6451(68.35)                 | 0.96   |
| Body mass index, kg/m <sup>2</sup>           | 24.49(22.66-26.44)          | 24.49(22.58-26.57)          | 0.68   |
| Current smoking                              | 1798(31.39)                 | 2954(31.30)                 | 0.91   |
| Heavy drinking                               | 780(13.62)                  | 1346(14.26)                 | 0.26   |
| Medical history                              |                             |                             |        |
| Stroke                                       | 1206(21.05)                 | 2149(22.77)                 | 0.01   |
| Hypertension                                 | 3539(61.78)                 | 5955(63.10)                 | 0.11   |
| Diabetes mellitus                            | 1248(21.79)                 | 2262(23.97)                 | 0.002  |
| Dyslipidemia                                 | 377(6.58)                   | 814(8.62)                   | <0.001 |
| Coronary artery disease                      | 581(10.14)                  | 1027(10.88)                 | 0.15   |
| Atrial fibrillation                          | 325(5.67)                   | 694(7.35)                   | <0.001 |
| NIHSS at admission                           |                             |                             | <0.001 |
| ≤3                                           | 3260(56.91)                 | 5000(52.98)                 |        |
| 3 to 10                                      | 2083(36.37)                 | 3702(39.22)                 |        |
| >10                                          | 385(6.72)                   | 736(7.80)                   |        |
| Pre stroke mRS score 2-5                     | 530(9.25)                   | 814(8.62)                   | 0.18   |
| Index event                                  |                             |                             | 0.03   |
| TIA                                          | 353(6.16)                   | 667(7.07)                   |        |
| Ischemic stroke                              | 5375(93.84)                 | 8771(92.93)                 |        |
| Rt-PA treatment                              | 337(5.88)                   | 966(10.24)                  | <0.001 |
| Baseline leukocyte count, 10 <sup>9</sup> /L | 6.90(5.74-8.40)             | 6.90(5.71-8.41)             | 0.84   |
| LDL, mmol/L                                  | 2.27(1.71-2.92)             | 2.32(1.73-2.98)             | 0.09   |
| Medication during hospitalization            |                             |                             |        |
| Antiplatelet                                 | 5508(97.30)                 | 9105(96.94)                 | 0.21   |
| Anticoagulants                               | 584(10.32)                  | 962(10.24)                  | 0.89   |
| Antihypertensive                             | 2571(45.42)                 | 4429(47.16)                 | 0.04   |
| Antidiabetic                                 | 1362(24.06)                 | 2430(25.87)                 | 0.01   |
| Statin                                       | 5378(99.87)                 | 9099(99.76)                 | 0.15   |
| HsCRP, mg/L                                  | 1.79(0.80-4.83)             | 1.77(0.82-4.71)             | 0.97   |

Variables are presented as median (interquartile range) or number (%).

NIHSS indicates National Institutes of Health Stroke Scale; mRS, modified Rankin Scale; TIA, transient ischemic attack; rt-PA, recombinant tissue plasminogen activator; LDL, Low-density lipoprotein cholesterol; hsCRP high-sensitivity C-reactive protein.

**Table S2. Association Between hsCRP Measured in Different Stage and Recurrent Stroke Within 1 Year in Subdistribution Hazard Model**

|                 | HsCRP. mg/L | sHR (95% CI) *  | P      | sHR (95% CI) †  | P     |
|-----------------|-------------|-----------------|--------|-----------------|-------|
| <24 hours       | Q1          | Reference       | -      | Reference       | -     |
|                 | Q2          | 1.10(0.71-1.69) | 0.67   | 1.08(0.70-1.65) | 0.73  |
|                 | Q3          | 1.03(0.67-1.59) | 0.90   | 1.00(0.65-1.55) | 0.99  |
|                 | Q4          | 1.56(1.04-2.34) | 0.03   | 1.50(1.00-2.25) | 0.05  |
|                 | <1          | Reference       | -      | Reference       | -     |
|                 | 1 to 3      | 1.11(0.75-1.62) | 0.61   | 1.07(0.73-1.57) | 0.72  |
|                 | >3          | 1.43(1.01-2.05) | 0.047  | 1.38(0.97-1.96) | 0.08  |
| 24–72 hours     | Q1          | Reference       | -      | Reference       | -     |
|                 | Q2          | 0.94(0.68-1.32) | 0.73   | 0.92(0.66-1.29) | 0.64  |
|                 | Q3          | 1.33(0.98-1.81) | 0.07   | 1.29(0.95-1.76) | 0.10  |
|                 | Q4          | 1.59(1.17-2.15) | 0.003  | 1.52(1.12-2.07) | 0.01  |
|                 | <1          | Reference       | -      | Reference       | -     |
|                 | 1 to 3      | 1.24(0.94-1.64) | 0.14   | 1.21(0.92-1.61) | 0.17  |
|                 | >3          | 1.52(1.17-1.99) | 0.002  | 1.47(1.12-1.92) | 0.005 |
| 72 hours–8 days | Q1          | Reference       | -      | Reference       | -     |
|                 | Q2          | 0.97(0.71-1.33) | 0.84   | 0.96(0.70-1.31) | 0.79  |
|                 | Q3          | 1.05(0.77-1.43) | 0.78   | 1.02(0.74-1.39) | 0.92  |
|                 | Q4          | 1.06(0.77-1.46) | 0.72   | 1.01(0.73-1.39) | 0.96  |
|                 | <1          | Reference       | -      | Reference       | -     |
|                 | 1 to 3      | 0.93(0.7-1.22)  | 0.59   | 0.91(0.69-1.20) | 0.50  |
|                 | >3          | 0.99(0.75-1.3)  | 0.93   | 0.95(0.72-1.25) | 0.71  |
| Total           | Q1          | Reference       | -      | Reference       | -     |
|                 | Q2          | 1.01(0.83-1.23) | 0.94   | 0.99(0.81-1.21) | 0.92  |
|                 | Q3          | 1.18(0.97-1.43) | 0.10   | 1.14(0.94-1.39) | 0.18  |
|                 | Q4          | 1.43(1.18-1.73) | <0.001 | 1.36(1.12-1.64) | 0.002 |
|                 | <1          | Reference       | -      | Reference       | -     |
|                 | 1 to 3      | 1.10(0.92-1.30) | 0.30   | 1.07(0.90-1.28) | 0.43  |
|                 | >3          | 1.32(1.12-1.56) | <0.001 | 1.27(1.08-1.49) | 0.005 |

\*Adjusted for age, sex, body mass index, current smoking, index event, medical histories of atrial fibrillation, coronary heart disease, stroke, diabetes, hypertension and hypercholesterolemia, baseline National Institutes of Health stroke scale score and baseline leukocyte count, rt-PA treatment, pre-mRS score.

†Adjusted for age, sex, body mass index, current smoking, index event, medical

histories of atrial fibrillation, coronary heart disease, stroke, diabetes, hypertension and hypercholesterolemia, baseline National Institutes of Health stroke scale score and baseline leukocyte count, rt-PA treatment, pre-mRS score and TOAST classification.

Abbreviation: sHR, subdistribution hazard ratio; CI, confidence intervals; rt-PA indicates recombinant tissue plasminogen activator; mRS, modified Rankin Scale.

**Table S3. Association Between hsCRP Measured in Different Stage and Combined Vascular Events Within 1 Year in Subdistribution Hazard Model**

|                 | HsCRP. mg/L | sHR (95% CI) *  | P      | sHR (95% CI) †  | P      |
|-----------------|-------------|-----------------|--------|-----------------|--------|
| <24 hours       | Q1          | Reference       | -      | Reference       | -      |
|                 | Q2          | 1.11(0.73-1.70) | 0.62   | 1.10(0.72-1.67) | 0.67   |
|                 | Q3          | 1.13(0.75-1.72) | 0.56   | 1.11(0.73-1.69) | 0.62   |
|                 | Q4          | 1.51(1.01-2.26) | 0.04   | 1.47(0.98-2.18) | 0.06   |
|                 | <1          | Reference       | -      | Reference       | -      |
|                 | 1 to 3      | 1.18(0.81-1.71) | 0.39   | 1.15(0.79-1.67) | 0.47   |
|                 | >3          | 1.44(1.01-2.04) | 0.04   | 1.39(0.98-1.98) | 0.06   |
| 24–72 hours     | Q1          | Reference       | -      | Reference       | -      |
|                 | Q2          | 0.96(0.69-1.33) | 0.79   | 0.93(0.67-1.29) | 0.67   |
|                 | Q3          | 1.45(1.07-1.96) | 0.02   | 1.41(1.04-1.90) | 0.03   |
|                 | Q4          | 1.73(1.28-2.33) | <0.001 | 1.65(1.23-2.23) | 0.001  |
|                 | <1          | Reference       | -      | Reference       | -      |
|                 | 1 to 3      | 1.32(1.01-1.74) | 0.05   | 1.30(0.99-1.71) | 0.06   |
|                 | >3          | 1.66(1.27-2.15) | <0.001 | 1.59(1.22-2.07) | <0.001 |
| 72 hours–8 days | Q1          | Reference       | -      | Reference       | -      |
|                 | Q2          | 0.95(0.70-1.29) | 0.73   | 0.94(0.69-1.28) | 0.69   |
|                 | Q3          | 1.00(0.74-1.36) | 0.99   | 0.98(0.72-1.33) | 0.88   |
|                 | Q4          | 1.06(0.77-1.44) | 0.73   | 1.01(0.74-1.38) | 0.94   |
|                 | <1          | Reference       | -      | Reference       | -      |
|                 | 1 to 3      | 0.91(0.69-1.19) | 0.49   | 0.89(0.68-1.17) | 0.42   |
|                 | >3          | 1.00(0.76-1.30) | 0.99   | 0.96(0.74-1.26) | 0.78   |
| Total           | Q1          | Reference       | -      | Reference       | -      |
|                 | Q2          | 1.01(0.83-1.23) | 0.95   | 0.99(0.81-1.20) | 0.91   |
|                 | Q3          | 1.22(1.01-1.48) | 0.04   | 1.19(0.99-1.44) | 0.07   |
|                 | Q4          | 1.46(1.21-1.76) | <0.001 | 1.39(1.16-1.68) | <0.001 |
|                 | <1          | Reference       | -      | Reference       | -      |
|                 | 1 to 3      | 1.13(0.96-1.34) | 0.15   | 1.11(0.94-1.32) | 0.23   |
|                 | >3          | 1.37(1.17-1.61) | <0.001 | 1.32(1.12-1.55) | <0.001 |

\*Adjusted for age, sex, body mass index, current smoking, index event, medical histories of atrial fibrillation, coronary heart disease, stroke, diabetes, hypertension and hypercholesterolemia, baseline National Institutes of Health stroke scale score and baseline leukocyte count, rt-PA treatment, pre-mRS score.

†Adjusted for age, sex, body mass index, current smoking, index event, medical

histories of atrial fibrillation, coronary heart disease, stroke, diabetes, hypertension and hypercholesterolemia, baseline National Institutes of Health stroke scale score and baseline leukocyte count, rt-PA treatment, pre-mRS score and TOAST classification.

Abbreviation: sHR, subdistribution hazard ratio; CI, confidence intervals; rt-PA indicates recombinant tissue plasminogen activator; mRS, modified Rankin Scale.
